# Supplementary material for: One-pot synthesis of Ag@silicalite-1 using different silver amine complexes and their performance for styrene oxidation
Source: Royal Society of Chemistry journal article supplement (doi:10.1039/d1nj04454k), 2021-01-01
Supplement: d1nj04454k1.pdf [file d1nj04454k1.pdf]

# Supporting Information

## **One-pot Synthesis of Ag@silicalite-1 with Different Silver Amine Complexes and the Performance for Styrene Oxidation**

Hongdan Zhang,<sup>a</sup> Zhiwei Wang,<sup>a</sup> Weidu Wang,<sup>a</sup> Chunyang Wu,<sup>a</sup> Tingting Lu,<sup>a</sup> Yifei Zhang,<sup>a</sup> Peng Cheng<sup>\*a</sup> and Zhen Zhao<sup>\*ab</sup>

<sup>a</sup> Institute of Catalysis for Energy and Environment, College of Chemistry and Chemical Engineering, Shenyang Normal University, Shenyang, 110034, China.

<sup>b</sup> State Key Laboratory of Heavy Oil Processing, China University of Petroleum, 18# Fuxue Road, Chang Ping, Beijing 102249, China.

*\*Corresponding author. E-mail: chengp1987@126.com, zhaozhen1586@163.com;*

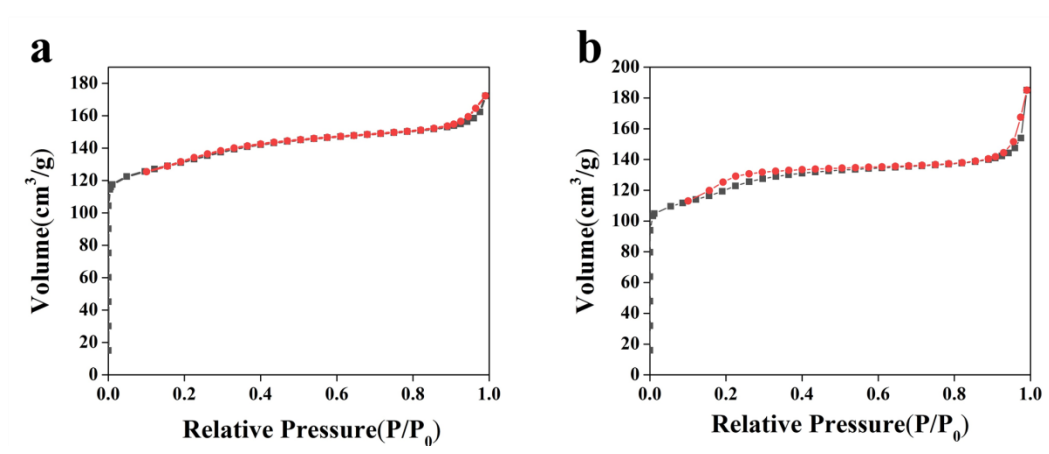

**Fig. S1** N<sub>2</sub> adsorption isotherms of (a) Ag@silicalite-1-D and (b) Ag@silicalite-1-E.
